# Supplementary material for: The Flavonoid Cyanidin Shows Immunomodulatory and Broad-Spectrum Antiviral Properties, Including SARS-CoV-2
Source: MDPI journal article supplement (doi:10.3390/v15040989), 2023-04-18
Supplement: s1 [file s1]

Supplementary Figure S1

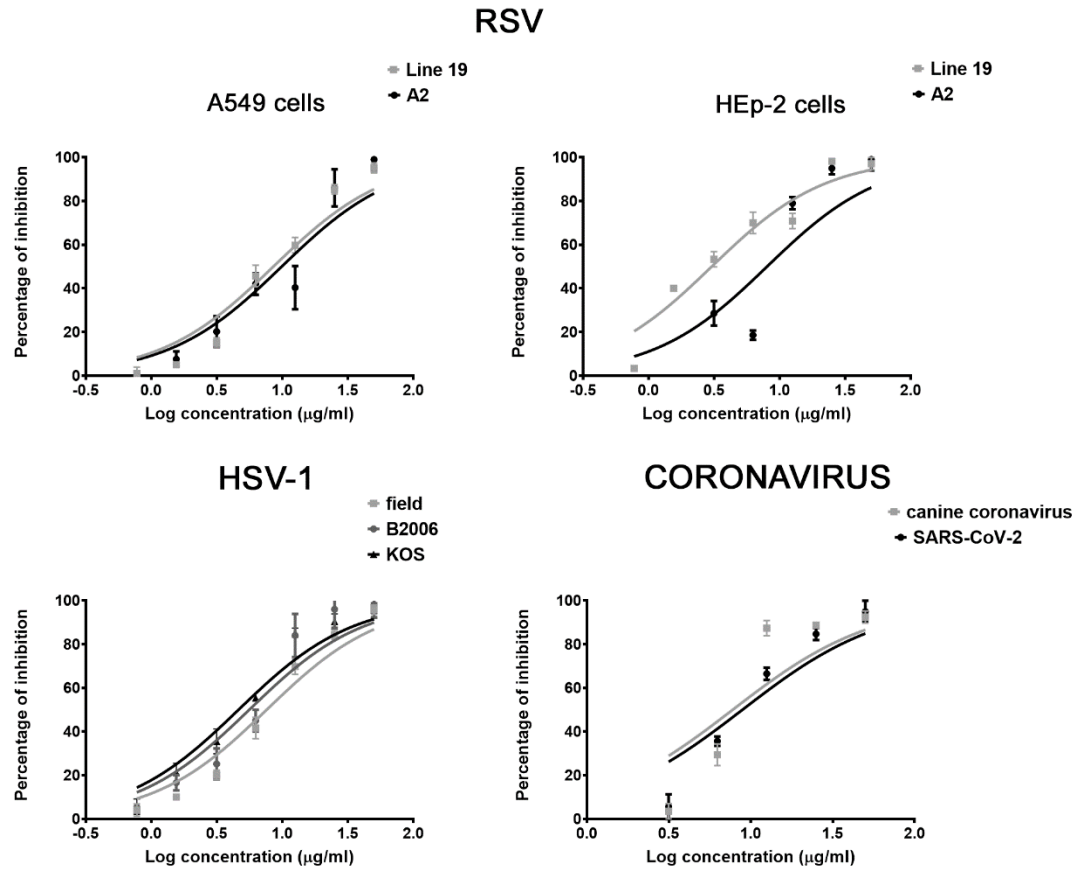

**Supplementary Figure S1.** Dose-dependent response of A18 on viral replication. Antiviral activity of different concentrations of A18 against RSV strains A2 and line 19 in HEP-2 and A549 cells; HSV-1 KOS, field and B2006 in HCLE cells; and SARS-CoV-2 in calu-3 cells, and canine coronavirus in CRFK cells. Data represent mean  $\pm$  SD for n = 3 independent experiments, performed in triplicate.

Supplementary Figure S2

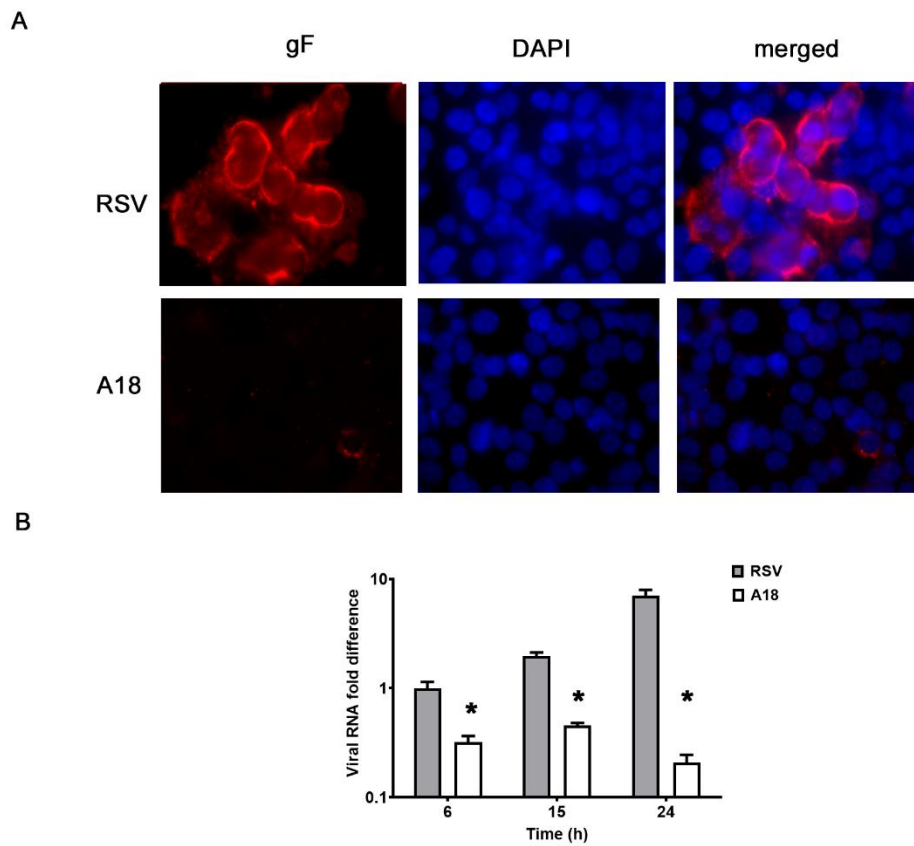

**Supplementary Figure S2.** Effect of A18 on RSV macromolecular synthesis in HEp-2 cells. (A) Protein expression. IF staining was performed to detect the intracellular localization RSV gF in HEp-2 cells infected with RSV A2 (moi= 1) and treated or not with A18 (25  $\mu$ g/ml) at 24 h p.i. Magnification: 400X. (B) Viral RNA synthesis. Total cellular RNA was extracted at the indicated times p.i. in HEp-2 cells and viral RNA was quantified by qRT-PCR. The amounts of viral RNA in untreated and treated cells with A18 (25  $\mu$ g/ml) in HEp-2 cells were calculated in comparison to the content of viral RNA in untreated infected cells at 6 h p.i., defined as 1. Data represent mean  $\pm$

SD for n = 3 independent experiments, performed in duplicate. \*Significantly different from CV (p-value <0.05).

Supplementary Figure S3

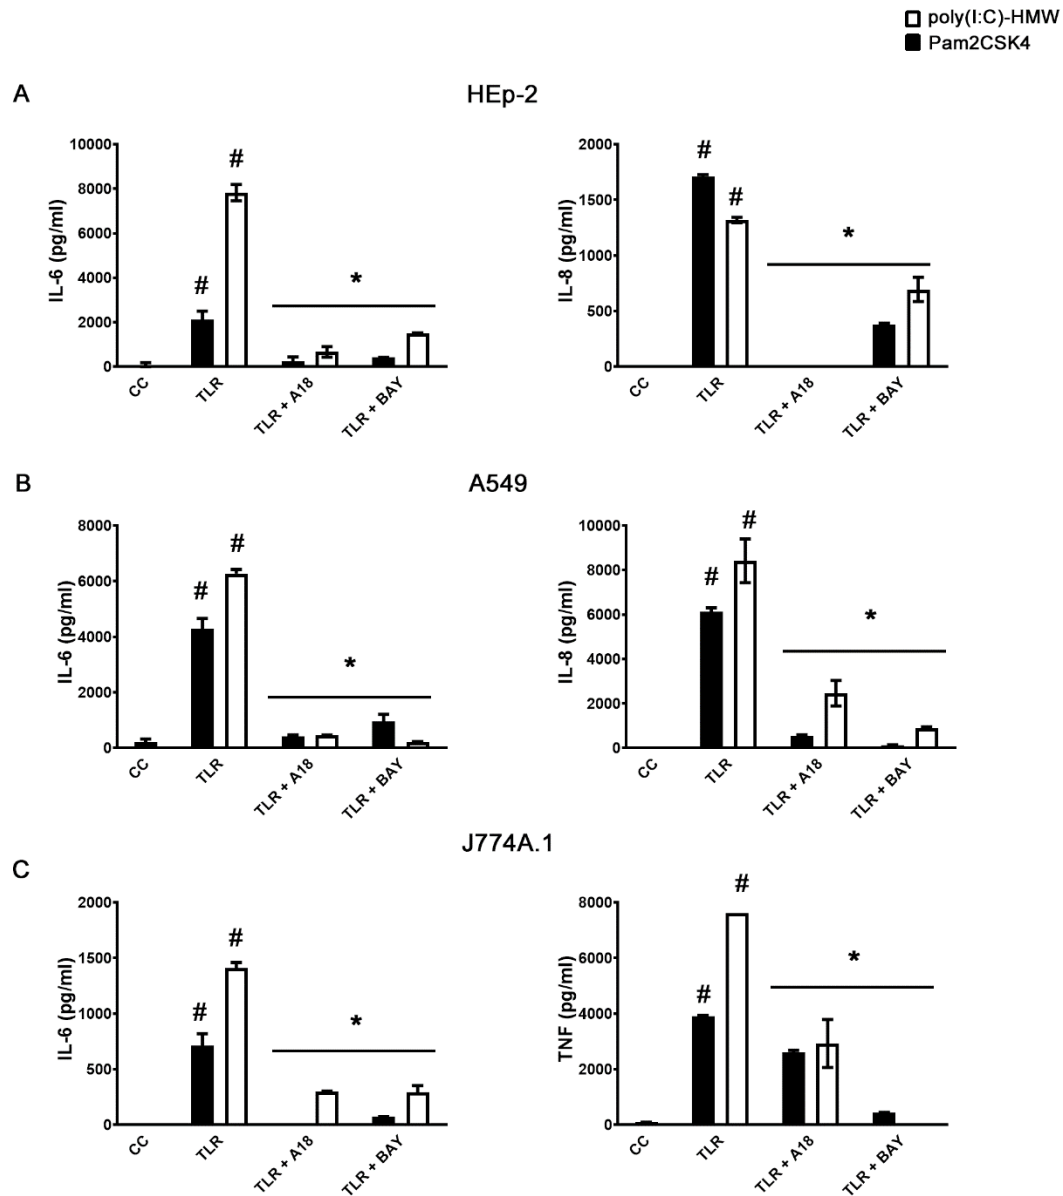

**Supplementary Figure S3.** Effect of A18 on cytokine production in TLRs stimulated cells. HEp-2 (A), A549 (B) and J774A.1 (C) cells were stimulated with Toll Like Receptor (TLR)2/6 (100 ng/ml) and TLR3 (10  $\mu$ g/ml) ligands and treated or not with

A18 (25  $\mu\text{g/ml}$ ) and BAY 11-7085 (10  $\mu\text{g/ml}$ ) for 8 h. IL-6, IL-8 and TNF- $\alpha$  were determined by ELISA. CC: cell control (unstimulated cells). Data represent mean  $\pm$  SD for n = 3 independent experiments, performed in duplicate. \*Significantly different from TLRs stimulated cells; # Significantly different from CC (p-value <0.05).
